1 Bayesian modelling of high-throughput sequencing assays with malacoda

2

3 Andrew R. Ghazi<sup>1</sup>, Xianguo Kong<sup>2</sup>, Ed S. Chen<sup>3</sup>, Leonard C. Edelstein<sup>2</sup>, Chad A. Shaw<sup>3</sup>

4 1. Quantitative and Computational Biosciences, Baylor College of Medicine, Houston,

5 Texas

6 2. Cardeza Foundation for Hematologic Research, Thomas Jefferson University,

7 Philadelphia, Pennsylvania

8 3. Molecular and Human Genetics, Baylor College of Medicine, Houston, Texas

9

## 10 **Abstract**

11 NGS studies have uncovered an ever-growing catalog of human variation while leaving  
12 an enormous gap between observed variation and experimental characterization of variant  
13 function. High-throughput screens powered by NGS have greatly increased the rate of variant  
14 functionalization, but the development of comprehensive statistical methods to analyze screen  
15 data has lagged behind. In the massively parallel reporter assay (MPRA), short barcodes are  
16 counted by sequencing DNA libraries transfected into cells and output RNA in order to  
17 simultaneously measure the shifts in transcription induced by thousands of genetic variants.  
18 These counts present many statistical challenges, including over-dispersion, depth dependence,  
19 and uncertain DNA concentrations. So far, the statistical methods used have been rudimentary,  
20 employing transformations on count level data and disregarding experimental and technical  
21 structure while failing to quantify uncertainty in the statistical model.

22

23           We have developed an extensive framework for the analysis of NGS functionalization  
24 screens available as an R package called malacoda (available from  
25 [github.com/andrewGhazi/malacoda](https://github.com/andrewGhazi/malacoda)). Our software implements a probabilistic, fully Bayesian  
26 model of screen data. The model uses the negative binomial distribution with gamma priors to  
27 model sequencing counts while accounting for effects from input library preparation and  
28 sequencing depth. The method leverages the high-throughput nature of the assay to estimate the  
29 priors empirically. External annotations such as ENCODE data or DeepSea predictions can also  
30 be incorporated to obtain more informative priors – a transformative capability for data  
31 integration. The package also includes quality control and utility functions, including automated  
32 barcode counting and visualization methods.

33           To validate our method, we analyzed several datasets datasets using malacoda and  
34 alternative MPRA analysis methods. These data include experiments from the literature,  
35 simulated assays, and primary MPRA data. We also used luciferase assays to experimentally  
36 validate the strongest hits from our primary data, as well as variants for which the various  
37 methods disagree and variants detectable only with the aid of external annotations.

## 38 **Author Summary**

39 Genetic sequencing technology has progressed rapidly in the past two decades. Huge genomic  
40 characterization studies have resulted in a massive quantity of background information across the  
41 entire genome, including catalogs of observed human variation, gene regulation features, and  
42 computational predictions of genomic function. Meanwhile, new types of experiments use the  
43 same sequencing technology to simultaneously test the impact of thousands of mutations on gene  
44 regulation. While the design of experiments has become increasingly complex, the data analysis  
45 methods deployed have remained overly simplistic, often relying on summary measures that

46 discard information. Here we present a statistical framework called for the analysis of massively  
47 parallel genomic experiments designed to incorporate prior information in an unbiased way. We  
48 validate our method by comparing our method to alternatives on simulated and real datasets, by  
49 using different types of assays that provide a similar type of information, and by closely  
50 inspecting an example experimental result that only our method detected. We also present the  
51 method's accompanying software package which provides an end-to-end pipeline that provides  
52 a simple interface for data preparation, analysis, and visualization.

## 53 **Introduction**

54 The advent of next generation sequencing (NGS) has generated an explosion of observed  
55 genetic variation in humans. Variants with unclear effects greatly outnumber those with obvious,  
56 severe impact; the 1000 Genomes Project [1] has estimated that a typical human genome has  
57 roughly 150 protein-truncating variants, 11,000 peptide-sequence altering variants, and 500,000  
58 variants falling into known regulatory regions. Simultaneously, genome-wide association studies  
59 (GWAS) have found strong statistical associations between thousands of noncoding variants and  
60 hundreds of human phenotypes [2,3]. Traditional methods of assessing the regulatory impact of  
61 variants are slow and low-throughput: luciferase reporter assays require multiple replications of  
62 cloning individual genomic regions, transfection into cells, and measurement of output intensity.

63 Massively Parallel Reporter Assays (MPRA), overviewed in Figure 1, were developed to  
64 assess simultaneously the transcriptional impact of thousands of genetic variants [4]. The  
65 simplest form of MPRA uses a carefully designed set of barcoded oligonucleotides containing  
66 roughly 150 base pairs of genomic context surrounding variants of interest. There are typically  
67 thousands of variants selected by preliminary evidence from GWAS, and there are usually ten to

68 thirty replicates of each allele with different barcodes. The oligonucleotides are cloned into  
69 plasmids, making a complex library that is then transfected into cells. The cells use the library as  
70 genetic material and actively transcribe the inserts. Because the barcodes are preserved by  
71 transcription, counting the RNA products of each variant construct by re-identifying each  
72 barcode in the NGS product provides a direct measure of the transcriptional output of a given  
73 genetic variant. By designing the oligonucleotide library to contain multiple barcodes of both the  
74 reference and alternate alleles for each variant, one can statistically assess the transcription shift  
75 (TS) for each variant.

76 **Fig1. Diagram of MPRA** MPRA simultaneously assess the transcription shift of thousands of  
77 variants. The diagram shows six constructs with two variants, but in practice the size of the  
78 oligonucleotide library is only limited by cost. A typical MPRA has tens to hundreds of  
79 thousands of oligonucleotides to assay thousands of variants.

80 MPRA have successfully identified many transcriptionally functional variants [5, 6, 7],  
81 but the accompanying statistical analyses have been rudimentary. Initial studies focused on the  
82 computation of the “activity” for each barcode in each RNA sample. This involves averaging  
83 across depth-adjusted counts to compute a normalizing DNA factor for each barcode, then  
84 dividing RNA counts by the DNA factor and taking the log of this ratio. Then a t-test is used to  
85 compare the activity measurements for each allele, followed by assay-wide multiple-testing  
86 corrections. The key limitations include ignoring systematic variation due to unknown DNA  
87 concentrations, the application of heavy transformation and summarization to the data prior to  
88 modelling, and the failure to include the reservoir of prior data and biological knowledge  
89 concerning genes and genomic regions. The methods mpralm [8] and MPRAscore [9] are more  
90 recent methods, but they suffer from a number of limitations: failure to model variation in input

91 DNA concentrations, aggregation of data across barcodes and sequencing samples without  
92 modeling systematic sources of variation, and over-reliance on point estimates of dispersion that  
93 cause systematic errors in transcription shift estimates.

94 Other areas of genomic analysis have generated a wealth of information on genomic  
95 structure and function, frequently specific to particular genomic contexts and variants. For  
96 example, the ENCODE project [10] provides genome-wide ChIP-seq data on transcription  
97 binding profiles, histone marks, and DNA accessibility. Computational methods such as  
98 DeepSea [11] use machine learning to provide variant-specific predictions on chromatin effects.  
99 Genome-wide databases like ENCODE and computational predictors like DeepSea contain real  
100 information about variant effects, but the method for incorporating this information into a  
101 statistical framework for experimental analysis of variants has been unclear.

102 We hypothesized that a Bayesian approach to high throughput NGS screens such as  
103 MPRA would improve statistical sensitivity and specificity and yield more accurate estimates of  
104 variant function, particularly when incorporating prior information. The Bayesian approach  
105 offers a flexible modeling system that can flexibly fit hierarchical model structures of count data  
106 while also directly accounting for experimental sources of variation. The Bayesian approach also  
107 enables the integration of prior information and probabilistic modelling of dispersion parameters.  
108 These advantages offer significant improvements in statistical efficiency and provide advantages  
109 for formulating systems-level hypotheses -- for example, the impact of specific transcription  
110 factors -- that are absent from other approaches. Here we present *malacoda*, an end-to-end  
111 Bayesian statistical framework that addresses the gaps in the prior approaches while providing  
112 novel methods for incorporating prior information. The malacoda method centers on MPRA but  
113 also has potential extension to a broad array of NGS-based high-throughput screens. We

114 establish the superior performance of malacoda on MPRA compared to alternatives using  
115 simulation studies. Then, we apply the method to previously published findings to make new  
116 biological discoveries that we explore in the paper. We also apply malacoda to primary MPRA  
117 studies that we performed. The results demonstrate that using malacoda we can discover  
118 biologically important findings that were missed by prior approaches. We have made the  
119 software available as an open source R package on GitHub.

## 120 **Methods**

### 121 **Overview**

122 In malacoda we utilize a negative binomial model for NGS to consider barcode counts  
123 with empirically estimated gamma priors, and we explicitly model variation in the input DNA  
124 concentrations for each barcode. By default the method marginally estimates the priors from the  
125 maximum likelihood estimates of each variant in the assay; the method also supports informative  
126 prior estimation by using external genomic annotations for each variant as weights. This  
127 approach enables disparate knowledge sources to inform the results in a principled, systematic,  
128 and calculation. The probabilistic model underlying malacoda uses the NGS data directly  
129 without transformation, and it accounts for all known sources of experimental variation and  
130 uncertainty in model parameters. Finally, the method provides estimate shrinkage as a method  
131 for avoiding false positives.

### 132 **Description of the statistical model**

133 MPRA data are the counts of the barcoded DNA input from sequencing the plasmid  
134 library and counts of the barcoded RNA outputs from sequencing the RNA content extracted

135 from passaged cells. The DNA counts vary according to the sequencing depth of the sample as  
136 well as due to the inherent noise in library preparation. The RNA measurements also vary  
137 according to sequencing depth, but they are also affected by the DNA input concentration and  
138 the inherent transcription rate of their associated region of genomic context. Figure 2A shows a  
139 subset of a typical MPRA dataset, with two barcodes of each allele for two variants and several  
140 columns of counts. We find that typically MPRA are performed with four to six RNA  
141 sequencing replicates and a smaller number of DNA replicate samples. Figure 2B shows a  
142 simplified Kruschke diagram of the model underlying malacoda, using the mean-dispersion  
143 parameterization of the negative binomial. More explicitly,

$$144 \quad \text{Counts}_{DNA} \sim \text{NegBin}(\text{depth}_s \cdot \mu_{bc} \cdot \varphi_{DNA})$$

$$145 \quad \text{Counts}_{RNA} \sim \text{NegBin}(\text{depth}_s \cdot \mu_{bc} \cdot \mu_{allele}, \varphi_{RNA})$$

146 Where  $\text{depth}_s$  indicates the depth of a particular sequencing sample,  $\mu_{bc}$  indicates the  
147 unknown concentration of a particular barcode in the plasmid library, and  $\mu_{allele}$  indicates the  
148 effect of the genomic context of a given allele of a given variant. There are separate dispersions  
149 parameters  $\varphi$  for both DNA and RNA. The means  $\mu$  and dispersions  $\varphi$  come from their own  
150 gamma priors.

151 The negative binomial distribution is a natural choice for modelling NGS count data  
152 given its ability to accurately fit overdispersed observations frequently seen in sequencing data  
153 [12]. Briefly, the observed dispersion in NGS count data usually exceeds that expected from  
154 simpler binomial or Poisson models. We chose gamma distributions as priors for several reasons.  
155 They have the appropriate  $[0, \infty)$  support, and for a non-negative random variable whose  
156 expectation and expected log exist, they are the maximum entropy distribution. Additionally,

157 they are characterized by two parameters, allowing the prior estimation process to accurately fit  
158 the observed population of negative binomial estimates. Probabilistic modelling of the dispersion  
159 parameters is key -- as demonstrated by simulation in S1 Appendix. This practice helps avoid  
160 pitfalls common to methods based on point estimates of dispersion parameters. The barcode-  
161 level count data model is a central contribution of the malacoda method.

162 **Fig 2. MPRA data and malacoda priors** A) The table shows a subset of our primary MPRA  
163 data. Highlighted cell containing 759 is influenced both by the sequencing depth of its sample  
164 (column) and the unknown input DNA concentration of its barcode (row). B) A simplified  
165 Kruschke diagram of the generative model underlying malacoda C) A conceptual diagram  
166 demonstrating three prior types available from malacoda. The marginal prior (left) weights all  
167 variants in the assay equally, while the grouped and conditional priors utilize informative  
168 annotations as weights in the prior estimation process.

169 After computing the joint posterior on all model parameters, the posterior on transcription  
170 shift is computed as a generated quantity by taking the difference between log means of the  
171 alternate and reference alleles. 95% highest density interval on TS is used to make binary calls  
172 on whether a variant is functional or non-functional. If the interval excludes zero as a credible  
173 value, the variant is labelled as functional. An optional “region of practical equivalence” can be  
174 defined on a per-assay basis when there is particular interest in rejecting transcription shift values  
175 around zero [13].

## 176 **Empirical priors**

177 The gamma priors are fit empirically by maximum likelihood estimation. Specifically,  
178 each variant-level model is first fit by maximizing the likelihood component of the malacoda



179 model, then gamma distributions are fit to those estimates for the means and dispersions of the  
180 DNA, reference RNA, and alternate RNA. This approach offers several benefits. First, it  
181 leverages the high-throughput nature of the assay. The full dataset determines the prior; in  
182 situations with thousands of variants the individual contribution of each variant to the prior is  
183 negligible. Secondly, it constrains the prior to be reasonable in the context of a given assay.  
184 Specific circumstances regarding library preparation, sequencer properties, cell culture  
185 conditions, and other unknown factors will cause the underlying statistical properties of each  
186 MPRA to be unique. A less informed, general-purpose prior, such as  $\text{gamma}(\alpha = .001, \beta = .001)$ ,  
187 would assign a considerable amount of probability density to unreasonable regions of parameter  
188 space. Empirical estimation ensures that the priors capture the reasonable range of values for  
189 each parameter while avoiding putting unwarranted density on extreme values [14]. Finally, by  
190 sharing information between variants, empirical priors provide estimate shrinkage. The prior  
191 effectively regularizes all parameter estimates, a behavior which is important in multi-parameter  
192 models with relatively little data per parameter. This in turn acts as a natural safeguard against  
193 false positives, thus removing the need for *post hoc* multiple testing correction.

194 In order to incorporate external knowledge, the malacoda method also allows users to  
195 provide arbitrary annotations to supplement the analysis. Figure 2C contrasts the marginal prior  
196 estimation (left) with two prior types that make use of external annotations. These priors make  
197 use of the information in the annotations by employing the principle that similarly annotated  
198 variants should perform similarly in the assay. When the annotations are simply a set of  
199 descriptive categories (for example predictions of likely benign, uncertain, or likely functional),  
200 the grouped prior (2C, center) simply fits a prior distribution within each subset. When the  
201 annotations are continuous values, the conditionally weighted (2C, right) prior employs a kernel

202 smoothing process to estimate the prior. To estimate the prior for a single variant, it initializes a  
203 t-distribution kernel centered at the annotation of the variant in question, then gradually widens  
204 this kernel until the  $n$ -th most highly weighted variant (where  $n$  is a configurable tuning  
205 parameter defaulting to 100) has a weight of at least one percent of that of the most influential  
206 variant. While the diagram in figure 2C shows this for only a single informative annotation on  
207 the horizontal axis, the code allows for an arbitrary number of continuous predictors to be used.

## 208 **Simulation and Validation Studies**

209 We took several approaches to validate and compare the malacoda method with  
210 alternatives. First, we simulated MPRA data using across a realistic grid of parameters governing  
211 the fraction of truly functional variants, the number of variants in the assay, and the number of  
212 barcodes per allele. These simulations also modelled distinct sequencing samples, varying  
213 sequencing depth, and barcode failure during library preparation. We then compared malacoda to  
214 alternative methods including the t-test, mpralm, and MPRAscore. Across these simulations we  
215 compared performance metrics such as area-under-curve (AUC) and estimate accuracy.  
216 Secondly, we applied malacoda and alternative methods to real MPRA data from the Ulirsch  
217 dataset [5], using inter-method consensus as a performance metric. We repeated this with our  
218 own primary MPRA data on variants related to platelet function. Finally, we tested a subset of  
219 variants where the various methods disagreed with luciferase reporter assays to assess  
220 consistency with MPRA estimates of variant function.

## 221 **Software**

222 Our method is available as an R package from [github.com/andrewGhazi/malacoda](https://github.com/andrewGhazi/malacoda). The  
223 package includes detailed installation instructions, extensive help documentation, an analysis

224 walkthrough vignette, and implementations of traditional activity-based analysis methods. The  
225 package also includes functionality to extract, quality-filter, and count barcodes from a set of  
226 FASTQ files through an application of the FASTX-Toolkit [15]. Through an interface with the  
227 FreeBarcodes package [16], the package can also decode sequencer errors in the barcodes of an  
228 assay that has been designed using our previous work, mpradesigntools [17]. In our experience  
229 this typically recaptures about 5% additional data with no additional cost beyond a line of code  
230 during the assay design. The package also contains plotting functionality to help visualize the  
231 results of analyses.

## 232 **Experimental Methods**

233 In order to collect experimental measurements of the transcriptional impact of variants  
234 through means other than MPRA, we performed luciferase reporter assays on sixteen variants.  
235 Four were among the strongest signals detected in our MPRA, six were variants from our MPRA  
236 where the statistical methods disagreed, and six were variants from the Ulirsch dataset [5] where  
237 the malacoda marginal and DeepSea-based [11] conditional prior model fits disagreed.

238 150-200bp genomic DNA sequences flanking the variants were amplified by PCR using  
239 K562 lymphoblast (ATCC) genomic DNA as template, then cloned into PGL4.28 minimum  
240 promoter luciferase reporter vector (Promega) at NheI and HindIII sites. Counterpart SNP  
241 variants were generated by site-directed mutagenesis. All the constructs were validated by DNA  
242 sequencing. 3 $\mu$ g plasmid preparations were co-transfected with 0.5 $\mu$ g  $\beta$ -gal plasmid into 1x10<sup>6</sup>  
243 of K562 cells with Lipofectamine 2000 based on manufacturer's instructions. Each assay was  
244 repeated with 3 independent plasmid preparations. 24 hours post transfection, luciferase and  $\beta$ -  
245 gal were measured. Luciferase units were then normalized to  $\beta$ -gal values.

## 246 **Results**

### 247 **Simulation Studies**

248 We evaluated our simulation results in three ways. First, we focused on the accuracy of  
249 transcription shift estimates. Figure 3A shows the results of analyzing one simulated dataset,  
250 with the true value of the simulation's transcription shift plotted on the x-axis, with the model  
251 estimates on the y-axis. For each fit of each simulation using each analysis method, we analyzed  
252 performance using two metrics: standard deviation of estimates for truly non-functional variants  
253 at zero (center dots, lower is better) and correlation with the truth for truly functional variants  
254 with nonzero effects (off-center dots, higher is better).

255

256 **Fig 3. Simulation results** A) The figure compares TS values used to generate simulated data to  
257 malacoda TS estimates. Simulated MPRA assays use a varying fraction of variants that are truly  
258 non-functional (center). B) ROC curves assess the performance of each method on a randomly  
259 selected assay with 3000 variants, 5% truly functional variants, and 10 barcodes per allele. C)  
260 Performance metrics averaged across multiple simulations under the same conditions as B. D) A  
261 scatterplot demonstrates the relationship between luciferase-based estimates of TS against  
262 MPRA-based estimates.

263

264 Second, we also computed area under the curve (AUC) for each method. Bayesian  
265 methods such as malacoda explicitly do not consider a null hypothesis and therefore do not  
266 output p-values; in order to create an analogous output quantity to derive an ROC curve we  
267 instead computed one minus the minimum HDI width necessary to include zero as a credible  
268 transcription shift value to distinguish true and false positives. Figure 3B shows the ROC curves

269 by method for a randomly chosen simulation with ten barcodes per allele, 5% truly functional  
270 variants, and 3000 variants. Figure 3C shows that across all simulations with these  
271 characteristics, malacoda consistently showed the highest median AUC, highest correlation with  
272 the truth for functional variants, and the lowest spread among estimates of truly nonfunctional  
273 variants. Other simulation grid points are shown in S2 Appendix, and these display similar  
274 patterns.

275 In order to examine the performance of malacoda on real data, we applied the various  
276 methods to both the Ulirsch data [5] and to our own primary dataset. Unlike the case with  
277 simulations, the underlying true values are not known. However, inter-method consensus can  
278 serve as a performance metric -- alternative methods presumably fail in different ways, so if they  
279 tend to disagree with one another but agree with malacoda, that would imply that malacoda is  
280 working well across the cases where others fail. Indeed, Figure 4 shows that the other methods  
281 tend to correlate with malacoda better than the other alternatives. The one exception is when  
282 applied to our dataset, mpralm tends to agree best with the t-test method. Given that linear  
283 models underlie both mpralm and the t-test method, it seems plausible that they would  
284 sometimes show similar results.

285

286 **Fig 4. Inter-method consensus** A) A pairwise plot of TS estimates in our MPRA, showing that  
287 other methods generally agree with malacoda more than each other. Color indicates local density  
288 of points. B) A pairwise plot of TS estimates using both the marginal and DeepSea-based  
289 malacoda priors in the Ulirsch dataset, showing a similar outcome.

290 **Biological results**

291 The number of luciferase reporter assays we performed was not enough to overcome the  
292 amount of noise inherent to light intensity-based measurements, thus we did not have enough  
293 data to clearly demonstrate that any of the MPRA analysis methods outperform the others in  
294 terms of correlation with luciferase results. However, the results show that the various methods  
295 are consistent with MPRA-based estimates Figure 3D, providing further evidence that MPRA  
296 results are biologically realistic.

297 We closely inspected a particular biological discovery to demonstrate malacoda's ability  
298 to identify low-signal variants. One of the functional variants we identified with malacoda using  
299 the DeepSea-based conditional prior in the Ulirsch dataset [5] is rs11865131; this variant is  
300 identified by malacoda but not by any of the other methods. The variant rs11865131 is in an  
301 intron within the *NPRL3* gene which encodes the Natriuretic Peptide Receptor Like 3 protein.  
302 *NPRL3* is part of the GTP-ase activating protein activity toward Rags [18] (GATOR1) complex.  
303 The GATOR1 complex inhibits mammalian target of rapamycin (*MTOR*) by inhibiting *RRAGA*  
304 function (reviewed in [18] *MTOR* signaling has been implicated in platelet aggregation and  
305 spreading in addition to aging associated venous thrombosis [19, 20]. Analysis of the  
306 rs11865131 locus indicates that it colocalizes with ENCODE ChIP-Seq peaks for 36  
307 transcription factors in K562 erythroleukemia cells as well as containing enhancer histone  
308 epigenetic marks. Together, these data indicate that this is likely an important regulatory region.  
309 In addition to the heterologous K562 cell line, data from cultured megakaryocytes indicates that  
310 rs11865131 lies within *RUNXI* and *SCL* ChIP-Seq peaks, two well-studied megakaryopoietic  
311 transcription factors [21]. This agrees with our data that platelet *NPRL3* mRNA is positively  
312 associated with platelet count in healthy humans [22, 23]. These data indicate that malacoda has

313 identified a likely important regulatory region for megakaryocytes and platelets that was missed  
314 by other MPRA analysis methods.

## 315 **Discussion**

316 We developed a fully Bayesian framework for the analysis of NGS high throughput  
317 screens with specific application to MPRA studies. The method is an advance in statistical and  
318 computational science for these data - a fully Bayesian model that probabilistically incorporates  
319 all known sources of variation. The method does a better job of identifying true positives in  
320 simulated data and performs well in empirical studies. The method identified a previously missed  
321 functional variant in the *NPRL3* gene that has confirmatory evidence from a variety of other  
322 studies. Particular advantages of the method are accurate estimation of variant effects, the  
323 treatment of the dispersion parameter in both estimation and inference, and the potential to  
324 incorporate informative prior information.

325 The functional discovery of the variant rs11865131 represents a demonstration of the  
326 power of the malacoda method to identify biologically important results missed by alternative  
327 methods. This variant lies in an intronic region of the gene *NPRL3*, and protein coding  
328 approaches to variant analysis would overlook this regulatory variant. Multiple lines of evidence  
329 point to the biological relevance of this variant, including epigenetic and transcription factor  
330 binding data as well as evidence of association with platelet count in healthy humans.

331 There are downsides to our method. First, Bayesian methods that estimate a joint  
332 posterior on many parameters by MCMC are significantly slower than optimization approaches.  
333 To address this, we fit our models with Stan [24], which allows us to perform a first pass fit with  
334 Automatic Differentiation Variational Inference [25] and, if seemingly worthwhile, to perform a  
335 final fit with Stan's state-of-the-art No-U-Turn Sampler. Despite this measure, our marginal prior

336 analysis of 8251 variants from the Ulirsch dataset with 50,000 MCMC samples using no  
337 variational first pass took over fifteen hours when parallelized across eighteen threads on two  
338 Intel Xeon X5675 3.07GHz processors. Nevertheless, an analysis that runs in hours is reasonable  
339 for an assay that takes weeks to perform.

340 Secondly, the efficacy of our method does not account for uncertainty in our empirical  
341 prior estimation functionality [14]. The R package includes a fully hierarchical model that adds  
342 an additional layer of hyperparameters in order to probabilistically model the gamma priors and  
343 all other parameters for an entire MPRA dataset at once, but this approach falls outside the  
344 intended scope of the malacoda framework. This model, featuring hundreds of thousands of  
345 parameters, is presently too complex to fit in practice.

346 The statistical method and validation work presented in this article has focused primarily  
347 on the analysis of “typical” MPRA: two alleles per variant, in a single tissue type, with no other  
348 experimental perturbations. However, we have expanded the modelling capabilities of the  
349 package beyond these limitations. Models tailored to more exotic experimental structures, such  
350 as arbitrary numbers of alleles per variant, multiple tissue types, or cell-culture perturbations, are  
351 also included with the package. We also have expanded the model framework included in the  
352 package beyond MPRA into CRISPR screen modelling: the counts of gRNAs targeting specific  
353 genes in survival/dropout screens can make use of an analogous negative binomial structure with  
354 similar empirical gamma priors. This opens the path to incorporating gene-level annotations into  
355 Bayesian CRISPR screen analysis.

356 Sophisticated high-throughput assays are a central component to the future of genomics.  
357 Therefore, the statistical methods used for these data should be as efficient as possible,  
358 accounting for all sources of variation and quantifying the resulting uncertainty. Our software,



359 malacoda, provides an end-to-end framework for the probabilistic analysis of MPRA data.  
360 Through our well-documented, easy-to-use R package, users can perform sequencing error  
361 correction and data pre-processing before executing a fully Bayesian analysis in as little as two  
362 lines of code. When informative annotations on variant function are available, malacoda is  
363 capable of taking full advantage through a conditional prior estimation process. We hope that  
364 this work may act as a stepping stone towards further integrative, probabilistic analysis in the  
365 field of high-throughput genomics.

366

## 367 **References**

368

- 369 1. Auton A, Abecasis GR, Altshuler DM, Durbin RM, Bentley DR, Chakravarti A, et al. A  
370 global reference for human genetic variation. *Nature* [Internet]. 2015;526(7571):68–74.  
371 doi: 10.1038/nature15393
- 372 2. Hindorf LA, Sethupathy P, Junkins HA, Ramos EM, Mehta JP, Collins FS, et al.  
373 Potential etiologic and functional implications of genome-wide association loci for  
374 human diseases and traits. *Proc Natl Acad Sci USA*. 2009;106(23):9362–7. doi:  
375 10.1073/pnas.0903103106
- 376 3. Nishizaki SS, Boyle AP. Mining the Unknown: Assigning Function to Noncoding Single  
377 Nucleotide Polymorphisms. *Trends Genet* [Internet]. 2017;33(1):34–45. doi:  
378 10.1016/j.tig.2016.10.008
- 379 4. Melnikov A, Murugan A, Zhang X, Tesileanu T, Wang L, Rogov P, et al. Systematic  
380 dissection and optimization of inducible enhancers in human cells using a massively

- 381 parallel reporter assay. *Nat Biotechnol* [Internet]. 2012;30(3):271–7. doi:  
382 10.1038/nbt.2137
- 383 5. Ulirsch JC, Nandakumar SK, Wang L, Giani FC, Zhang X, Rogov P, et al. Systematic  
384 functional dissection of common genetic variation affecting red blood cell traits. *Cell*  
385 [Internet]. 2016;165(6):1530–45. doi: 10.1016/j.cell.2016.04.048
- 386 6. Tewhey R, Kotliar D, Park DS, Liu B, Winnicki S, Reilly SK, et al. Direct identification  
387 of hundreds of expression-modulating variants using a multiplexed reporter assay. *Cell*  
388 [Internet]. 2016;165(6):1519–29. doi: 10.1016/j.cell.2016.04.027
- 389 7. Shen SQ, Myers CA, Hughes AEO, Byrne LC, Flannery JG, Corbo JC. Massively  
390 parallel cis-regulatory analysis in the mammalian central nervous system. *Genome Res.*  
391 2016;26(2):238–55. doi: 10.1101/gr.193789.115
- 392 8. Myint L, Avramopoulos DG, Goff LA, Hansen KD. Linear models enable powerful  
393 differential activity analysis in massively parallel reporter assays. *BMC Genomics.*  
394 2019;20(1):1–19. doi: 10.1186/s12864-019-5556-x
- 395 9. Niroula A, Ajore R, Nilsson B. MPRAscore: robust and non-parametric analysis of  
396 massively parallel reporter assays. *Bioinformatics.* 2019;(July):1–3. doi:  
397 10.1093/bioinformatics/btz591
- 398 10. Consortium EP. An integrated encyclopedia of DNA elements in the human genome.  
399 *Nature.* 2013;489(7414):57–74. doi: 10.1038/nature11247.An
- 400 11. Zhou J, Troyanskaya OG. Predicting effects of noncoding variants with deep learning-  
401 based sequence model. (DeepSea). *Nat Methods* [Internet]. 2015;12(10):931–4. doi:  
402 10.1038/nmeth.3547

- 403 12. Love MI, Huber W, Anders S. Moderated estimation of fold change and dispersion for  
404 RNA-seq data with DESeq2. *Genome Biol* [Internet]. 2014;15(12):550. doi:  
405 10.1186/s13059-014-0550-8
- 406 13. Kruschke J. *Doing Bayesian Data Analysis: A Tutorial with R, JAGS, and Stan*. 2nd ed.  
407 London: Academic Press; c2015. P.336-40.
- 408 14. Gelman A, Carlin JB, Stern HS, Dunson DB, Vehtari A, Rubin DB. *Bayesian Data*  
409 *Analysis*. Third Edition. Boca Raton, FL: CRC Press; 2013. p. 51-6, p. 102-4.
- 410 15. Assaf G, Hannon GJ. FASTX-Toolkit [Internet]. 2010. Available from:  
411 [http://hannonlab.cshl.edu/fastx\\_toolkit/index.html](http://hannonlab.cshl.edu/fastx_toolkit/index.html)
- 412 16. Hawkins JA, Jones SK, Finkelstein IJ, Press WH. Indel-correcting DNA barcodes for  
413 high-throughput sequencing. *Proc Natl Acad Sci* [Internet]. 2018;115(27):E6217–26. doi:  
414 10.1073/pnas.1802640115
- 415 17. Ghazi AR, Chen ES, Henke DM, Madan N, Edelstein LC, Shaw CA. Design tools for  
416 MPRA experiments. *Bioinformatics*. 2018;34(15):2682–3. doi:  
417 10.1093/bioinformatics/bty150
- 418 18. Shaw RJ. GATORs take a bite out of mTOR. *Science*. 2013;340(6136):1056–7. doi:  
419 10.1126/science.1240315
- 420 19. Aslan JE, Tormoen GW, Loren CP, Pang J, McCarty OJT. S6K1 and mTOR regulate  
421 Rac1-driven platelet activation and aggregation. *Blood*. 2011;118(11):3129–36. doi:  
422 10.1182/blood-2011-02-331579
- 423 20. Yang J, Zhou X, Fan X, Xiao M, Yang D, Liang B, et al. MTORC1 promotes aging-  
424 related venous thrombosis in mice via elevation of platelet volume and activation. *Blood*.  
425 2016;128(5):615–24. doi: 10.1182/blood-2015-10-672964

- 426 21. Chacon D, Beck D, Perera D, Wong JWH, Pimanda JE. BloodChIP: A database of  
427 comparative genome-wide transcription factor binding profiles in human blood cells.  
428 Nucleic Acids Res. 2014;42(D1):172–7. doi: 10.1093/nar/gkt1036
- 429 22. Simon LM, Edelstein LC, Nagalla S, Woodley AB, Chen ES, Kong X, et al. Human  
430 platelet microRNA-mRNA networks associated with age and gender revealed by  
431 integrated plateletomics. Blood. 2014;123(16):37–45. doi: 10.1182/blood-2013-12-  
432 544692
- 433 23. Edelstein LC, Simon LM, Montoya RT, Holinstat M, Chen ES, Bergeron A, et al. Racial  
434 differences in human platelet PAR4 reactivity reflect expression of PCTP and miR-376c.  
435 Nat Med [Internet]. 2013;19(12):1609–16. doi: 10.1038/nm.3385
- 436 24. Carpenter B, Gelman A, Hoffman MD, Lee D, Goodrich B, Betancourt M, Brubaker M,  
437 Guo J, Li P, Riddell A. Stan: A probabilistic programming language. J Stat Softw.  
438 2017;76(1). doi: 10.18637/jss.v076.i01
- 439 25. Kucukelbir A, Blei DM, Gelman A, Ranganath R, Tran D. Automatic Differentiation  
440 Variational Inference. J Mach Learn Res. 2017;18:1–45. Available from:  
441 <https://arxiv.org/abs/1603.00788>

## 442 **Supporting Information**

443 **S1 Appendix. Negative Binomial variance estimation.**

444 **S2 Appendix. Simulation details and extended results.**

445 **S3 Dataset. RData file of luciferase and MPRA results.** An RData file that loads two objects:  
446 `luc_results`, a table of the luciferase results, and `mpra_results`, giving the primary data on MPRA  
447 counts for the variants tested with luciferase

448 **S4 Dataset. RData file of estimate comparisons.** The data necessary to produce Figure 4. An  
449 RData file that contains two data frames: `ulirsch_comparisons` and `primary_comparisons`. Each  
450 row corresponds to one variant, and each column corresponds to a given analysis method. The  
451 values in the table give the transcription shift estimates.

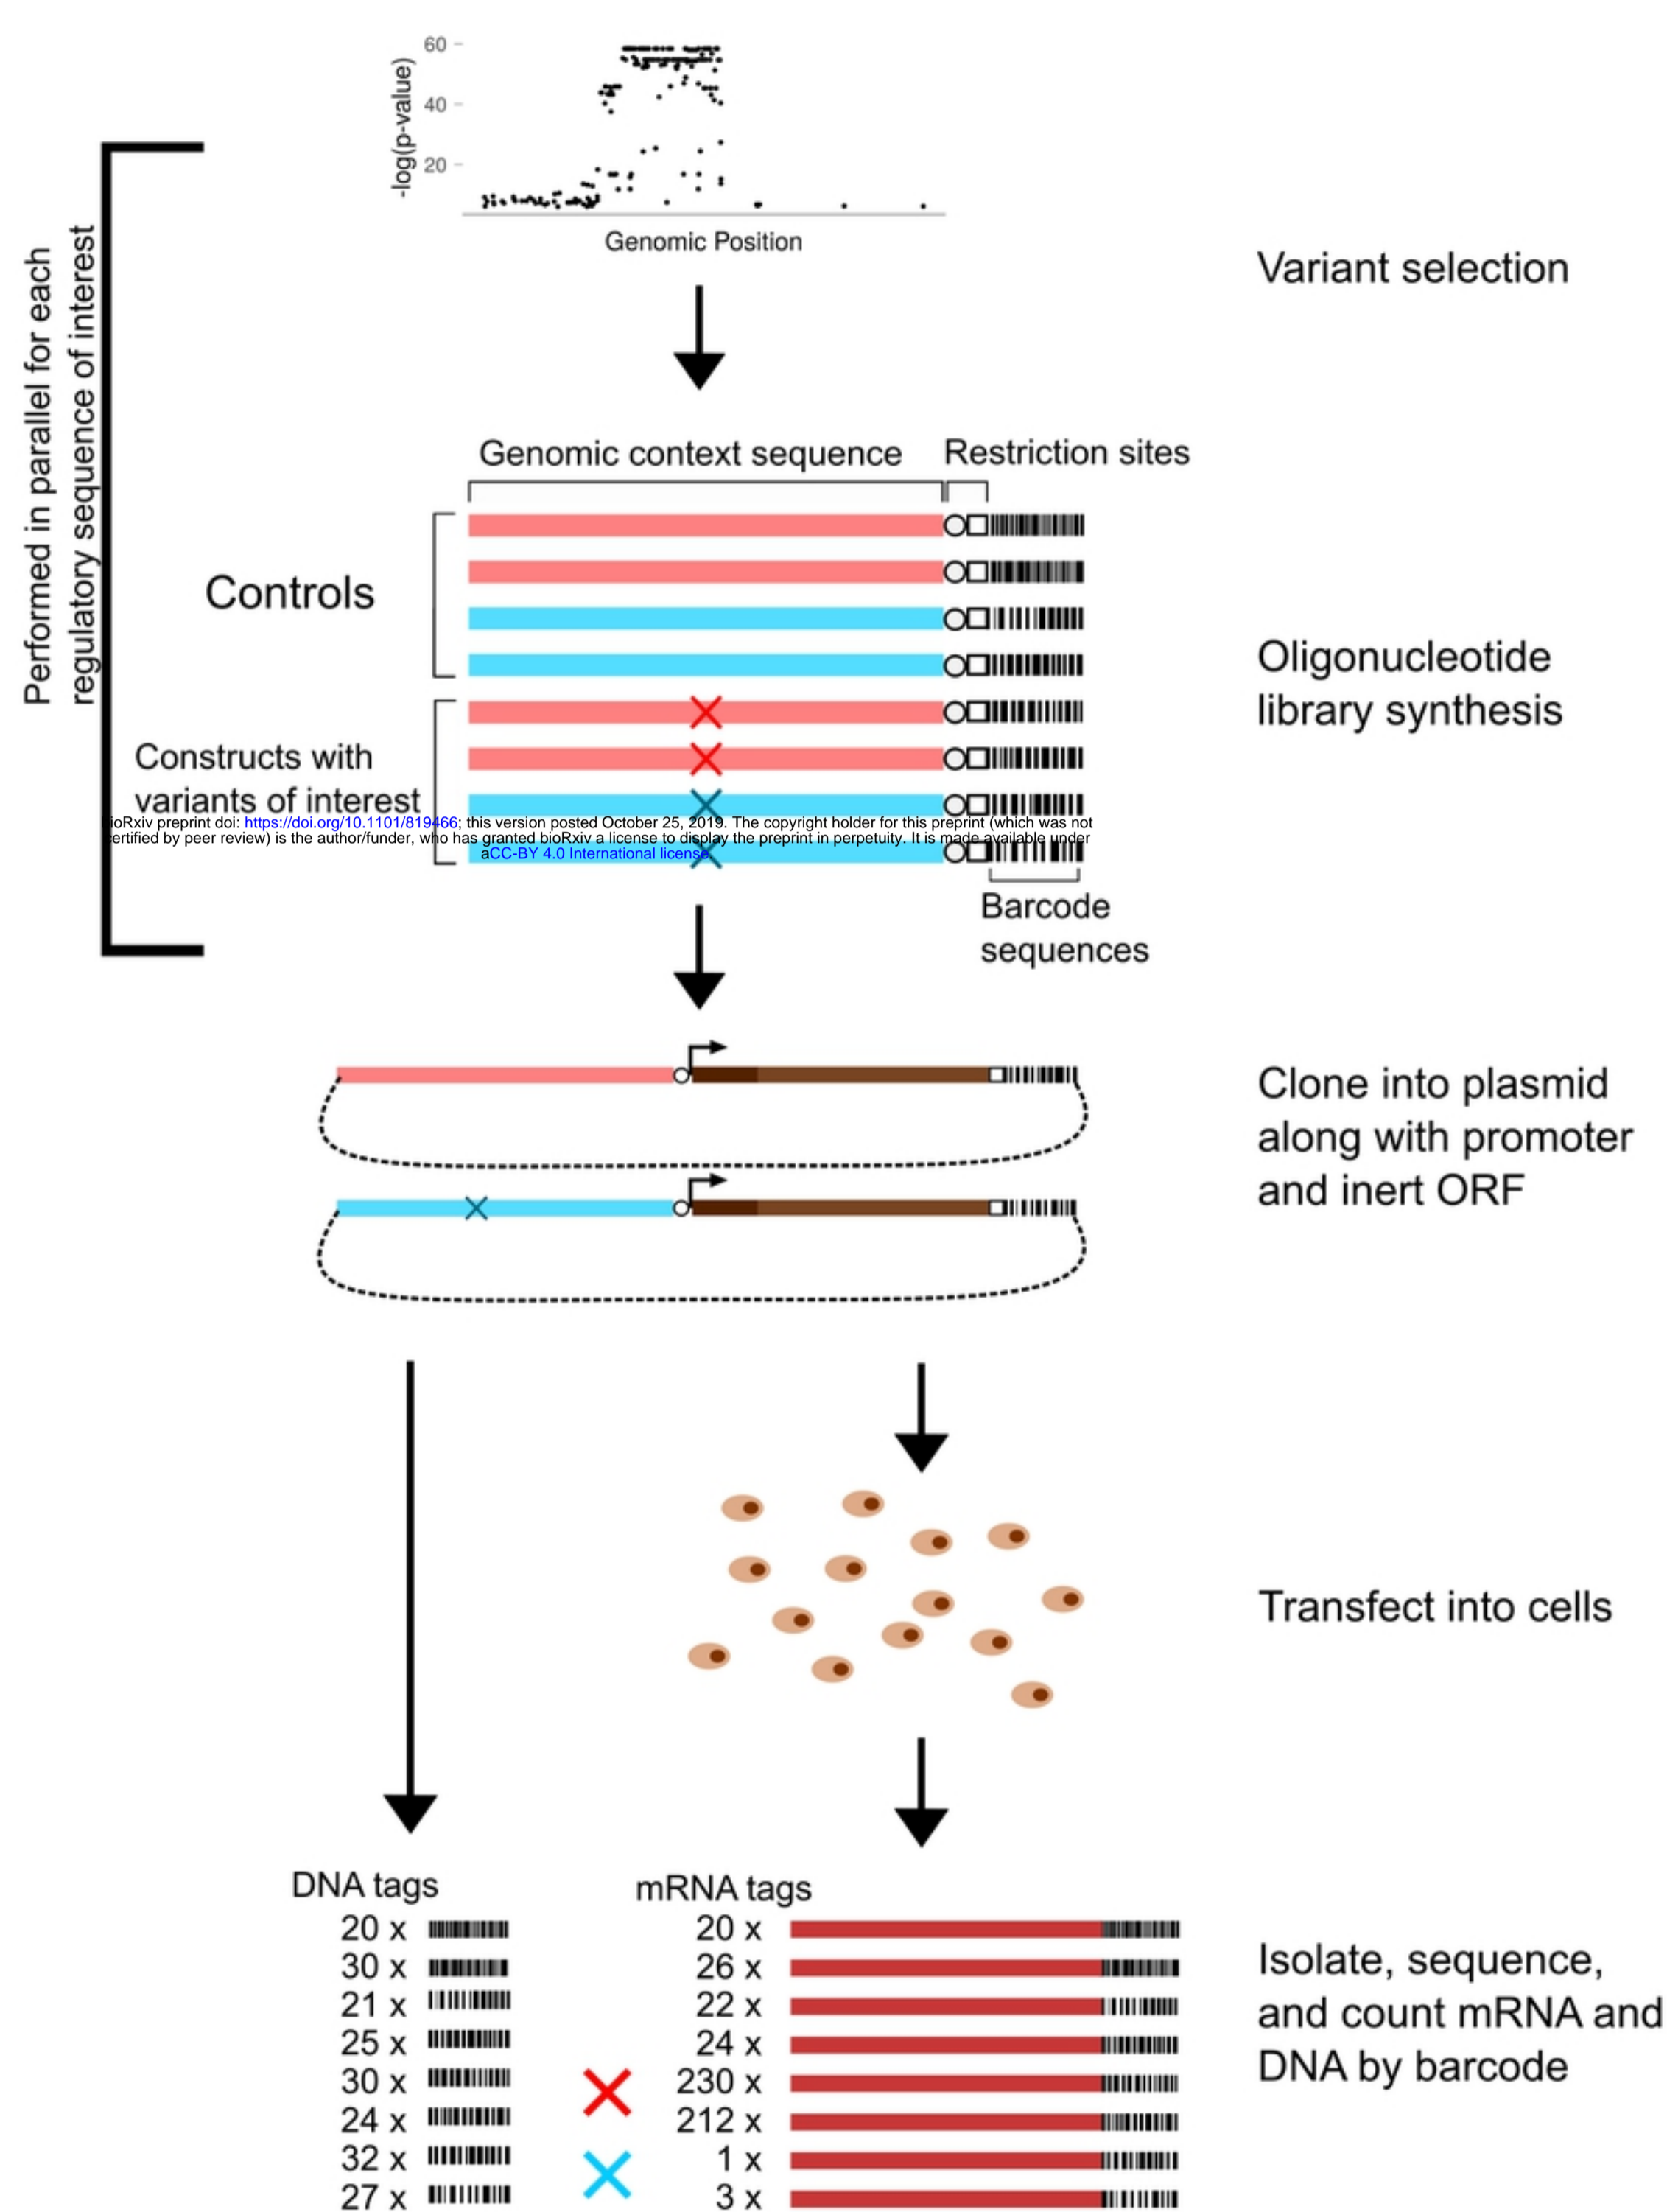



**A**

| variant_id          | allele | barcode         | MPRA_DNA1 | MPRA_DNA2 | MPRA_RNA1 | MPRA_RNA2 | MPRA_RNA3 |
|---------------------|--------|-----------------|-----------|-----------|-----------|-----------|-----------|
| 7_79758455_C_T_CD36 | ref    | GCCATAAGCAGTCT  | 473       | 788       | 3329      | 8337      | 5106      |
|                     |        | TTACGAATAGTGCG  | 362       | 549       | 3571      | 7342      | 4259      |
|                     | alt    | TAGCTGTTCTGAC   | 1807      | 2887      | 1788      | 4422      | 3166      |
|                     |        | ATGCCGTTGCGATT  | 48        | 48        | 40        | 0         | 48        |
| rs11749731          | ref    | AACCGTCGCGTAGT  | 543       | 868       | 248       | 759       | 489       |
|                     |        | CACGCAATGTCTTA  | 173       | 246       | 93        | 89        | 75        |
|                     | alt    | CTTCGTACTIONTCC | 412       | 638       | 370       | 685       | 707       |
|                     |        | AGGACGCAATACAA  | 284       | 569       | 520       | 1107      | 1090      |
| rs2236053           | ref    | CTACCGCGTCACTA  | 457       | 660       | 1616      | 3875      | 3164      |
|                     |        | CTACCGCGTGTAGG  | 69        | 123       | 314       | 366       | 365       |
|                     | alt    | ATCTGTGCGCGCTAT | 165       | 248       | 540       | 998       | 593       |
|                     |        | TAGCGTGTACTTCA  | 1122      | 1708      | 3819      | 8397      | 6181      |

bioRxiv preprint doi: <https://doi.org/10.1101/819466>; this version posted October 25, 2019. The copyright holder for this preprint (which was not certified by peer review) is the author/funder, who has granted bioRxiv a license to display the preprint in perpetuity. It is made available under aCC-BY 4.0 International license.

**B**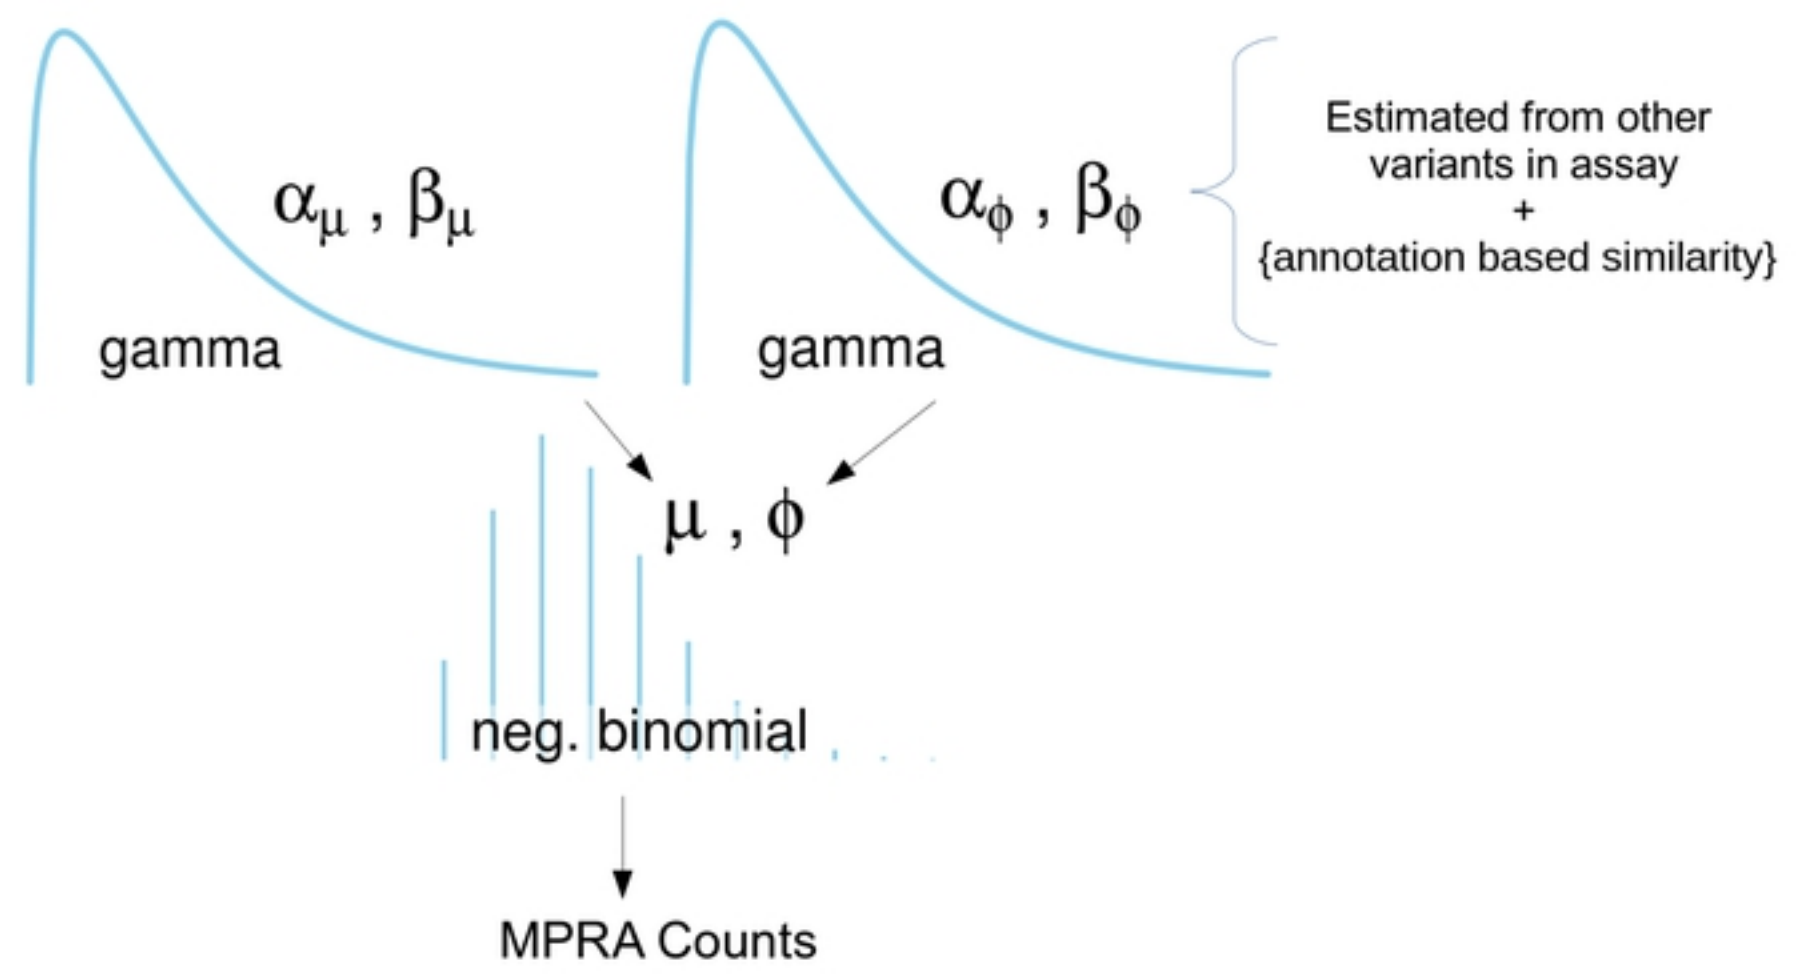**C**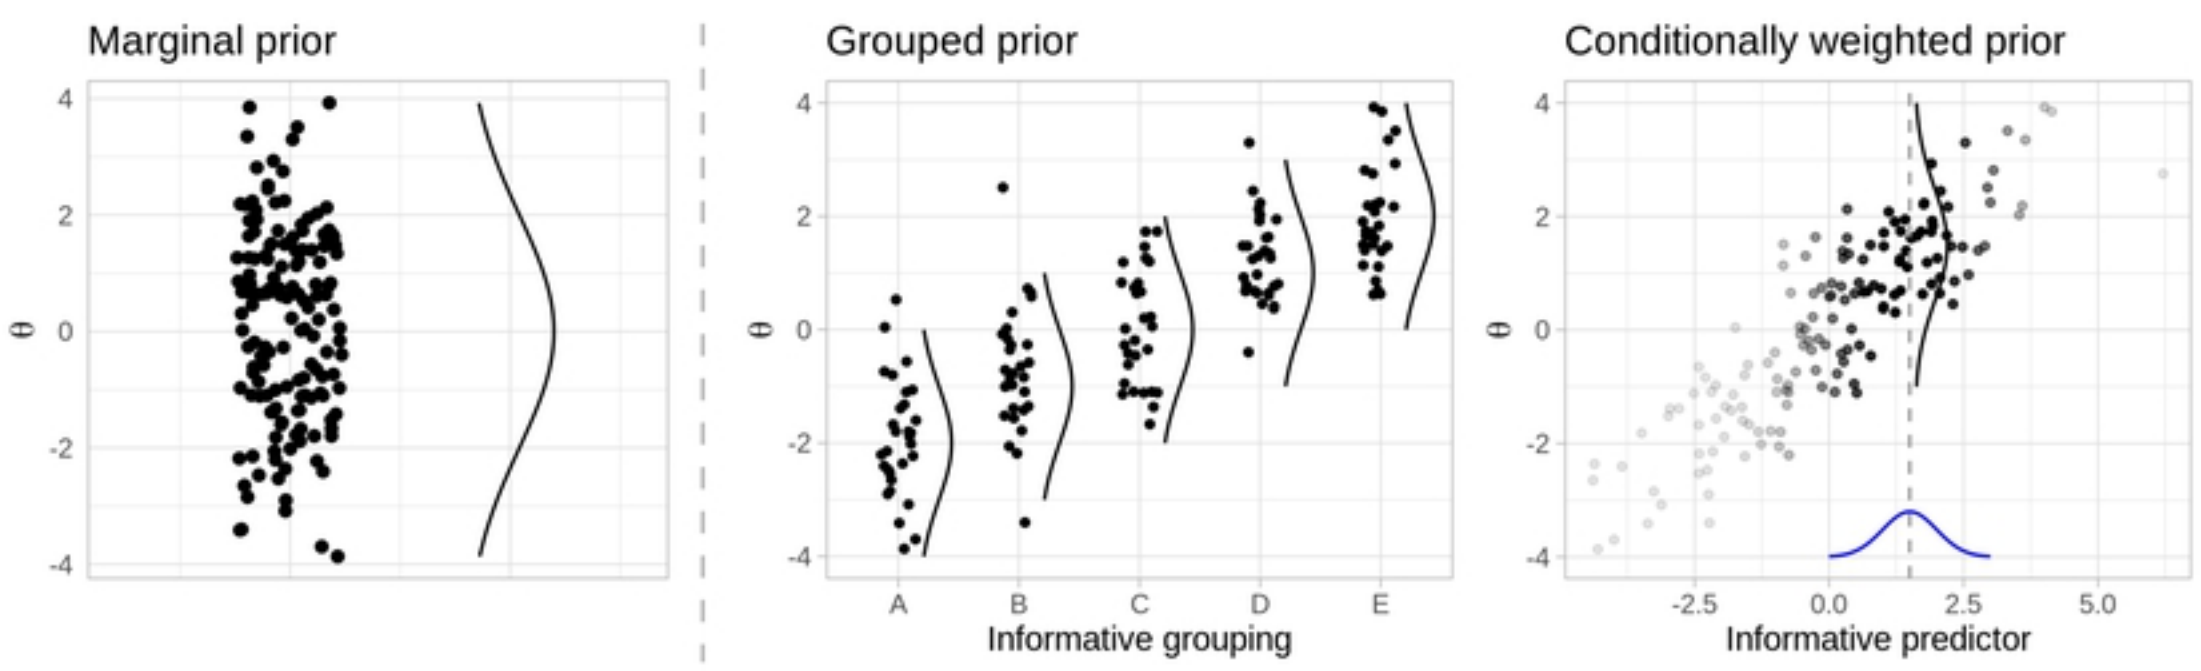

Figure 2

A

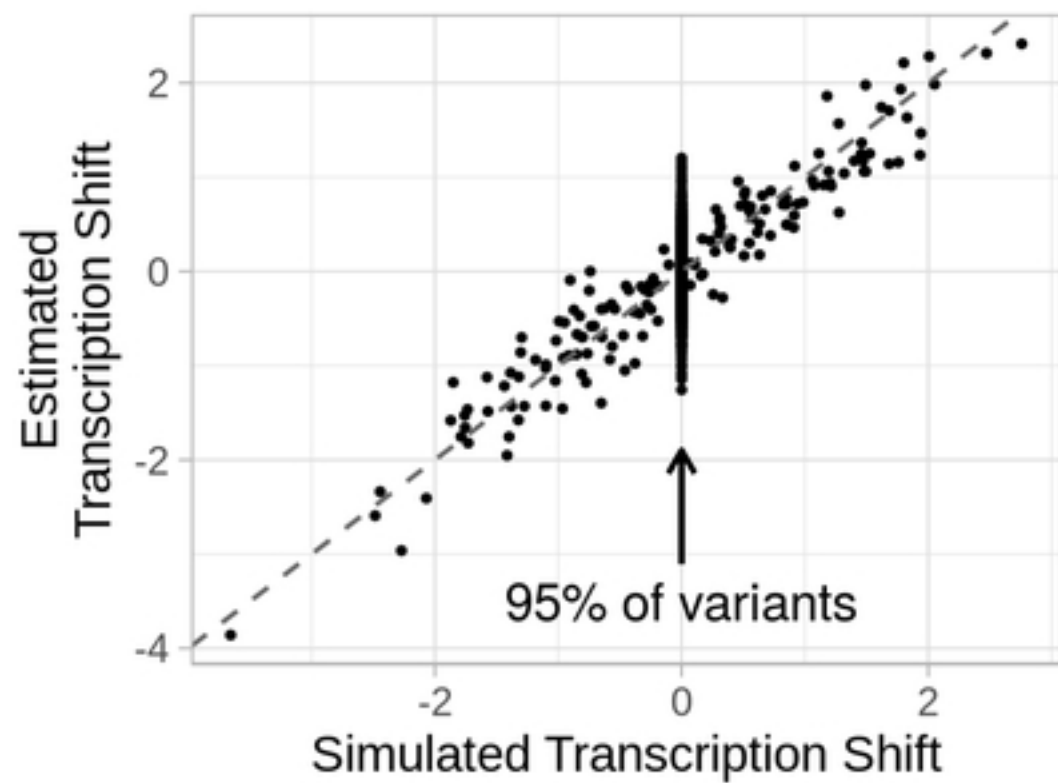

B

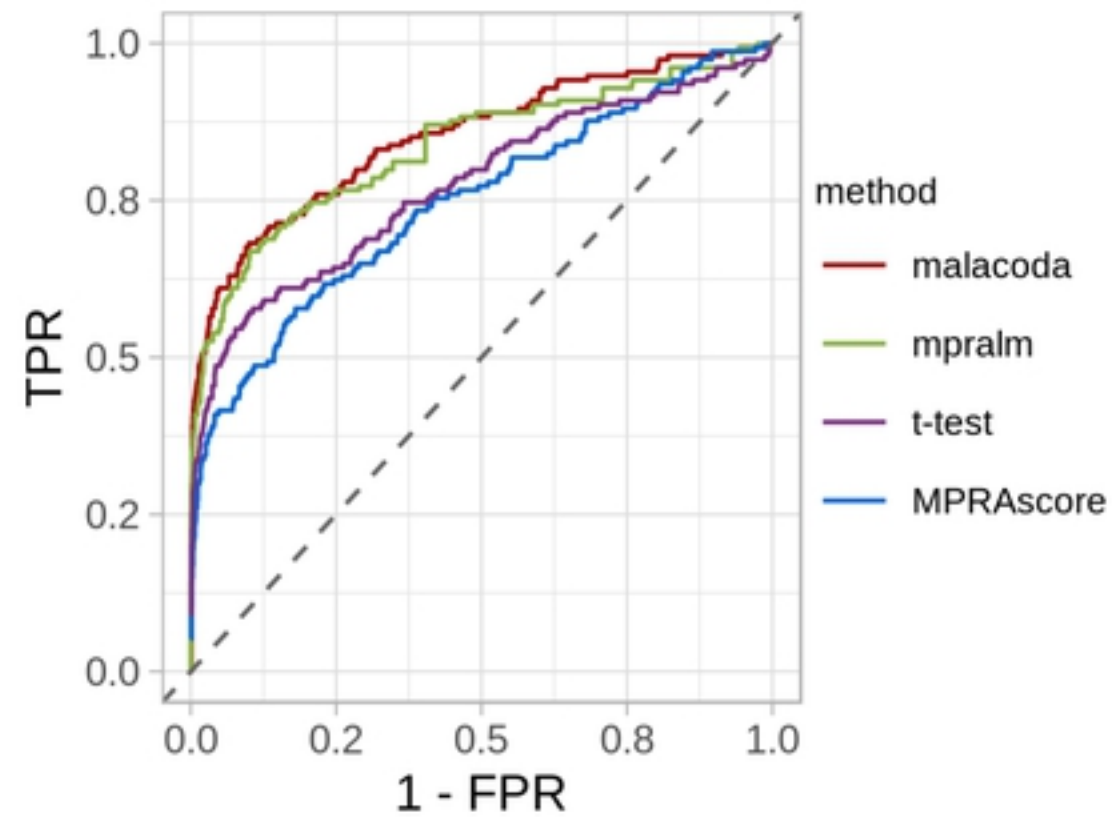

C

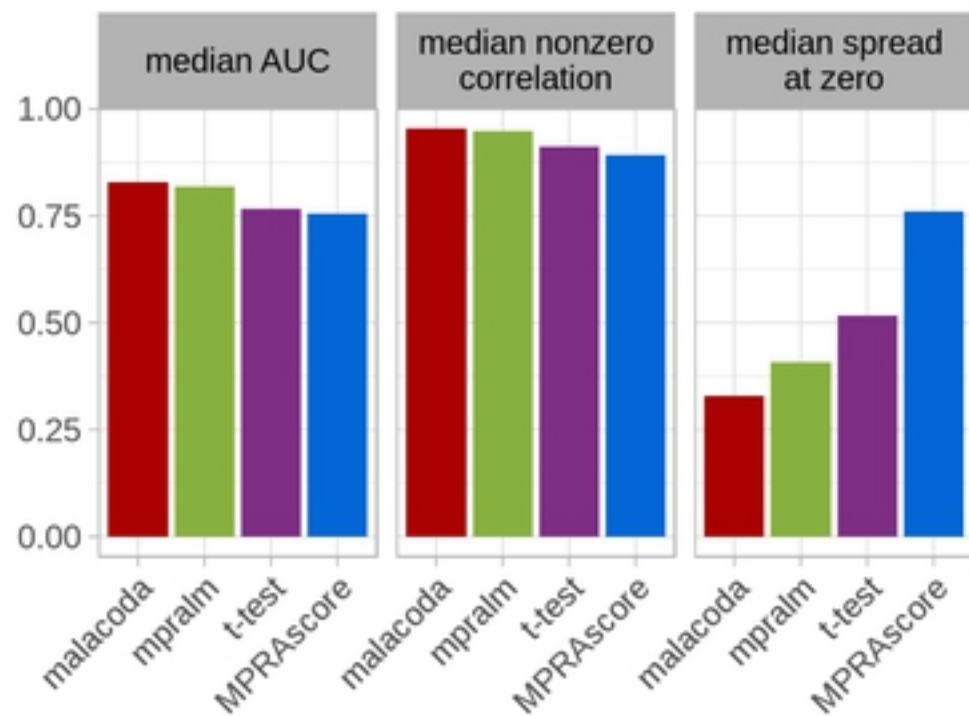

D

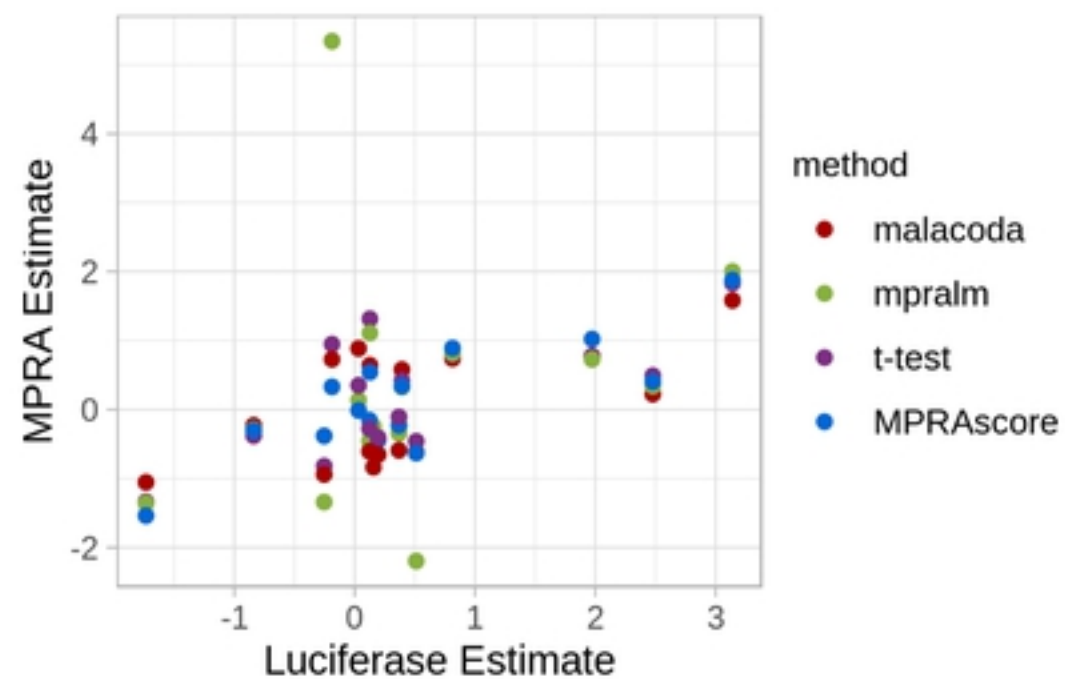

Figure 3



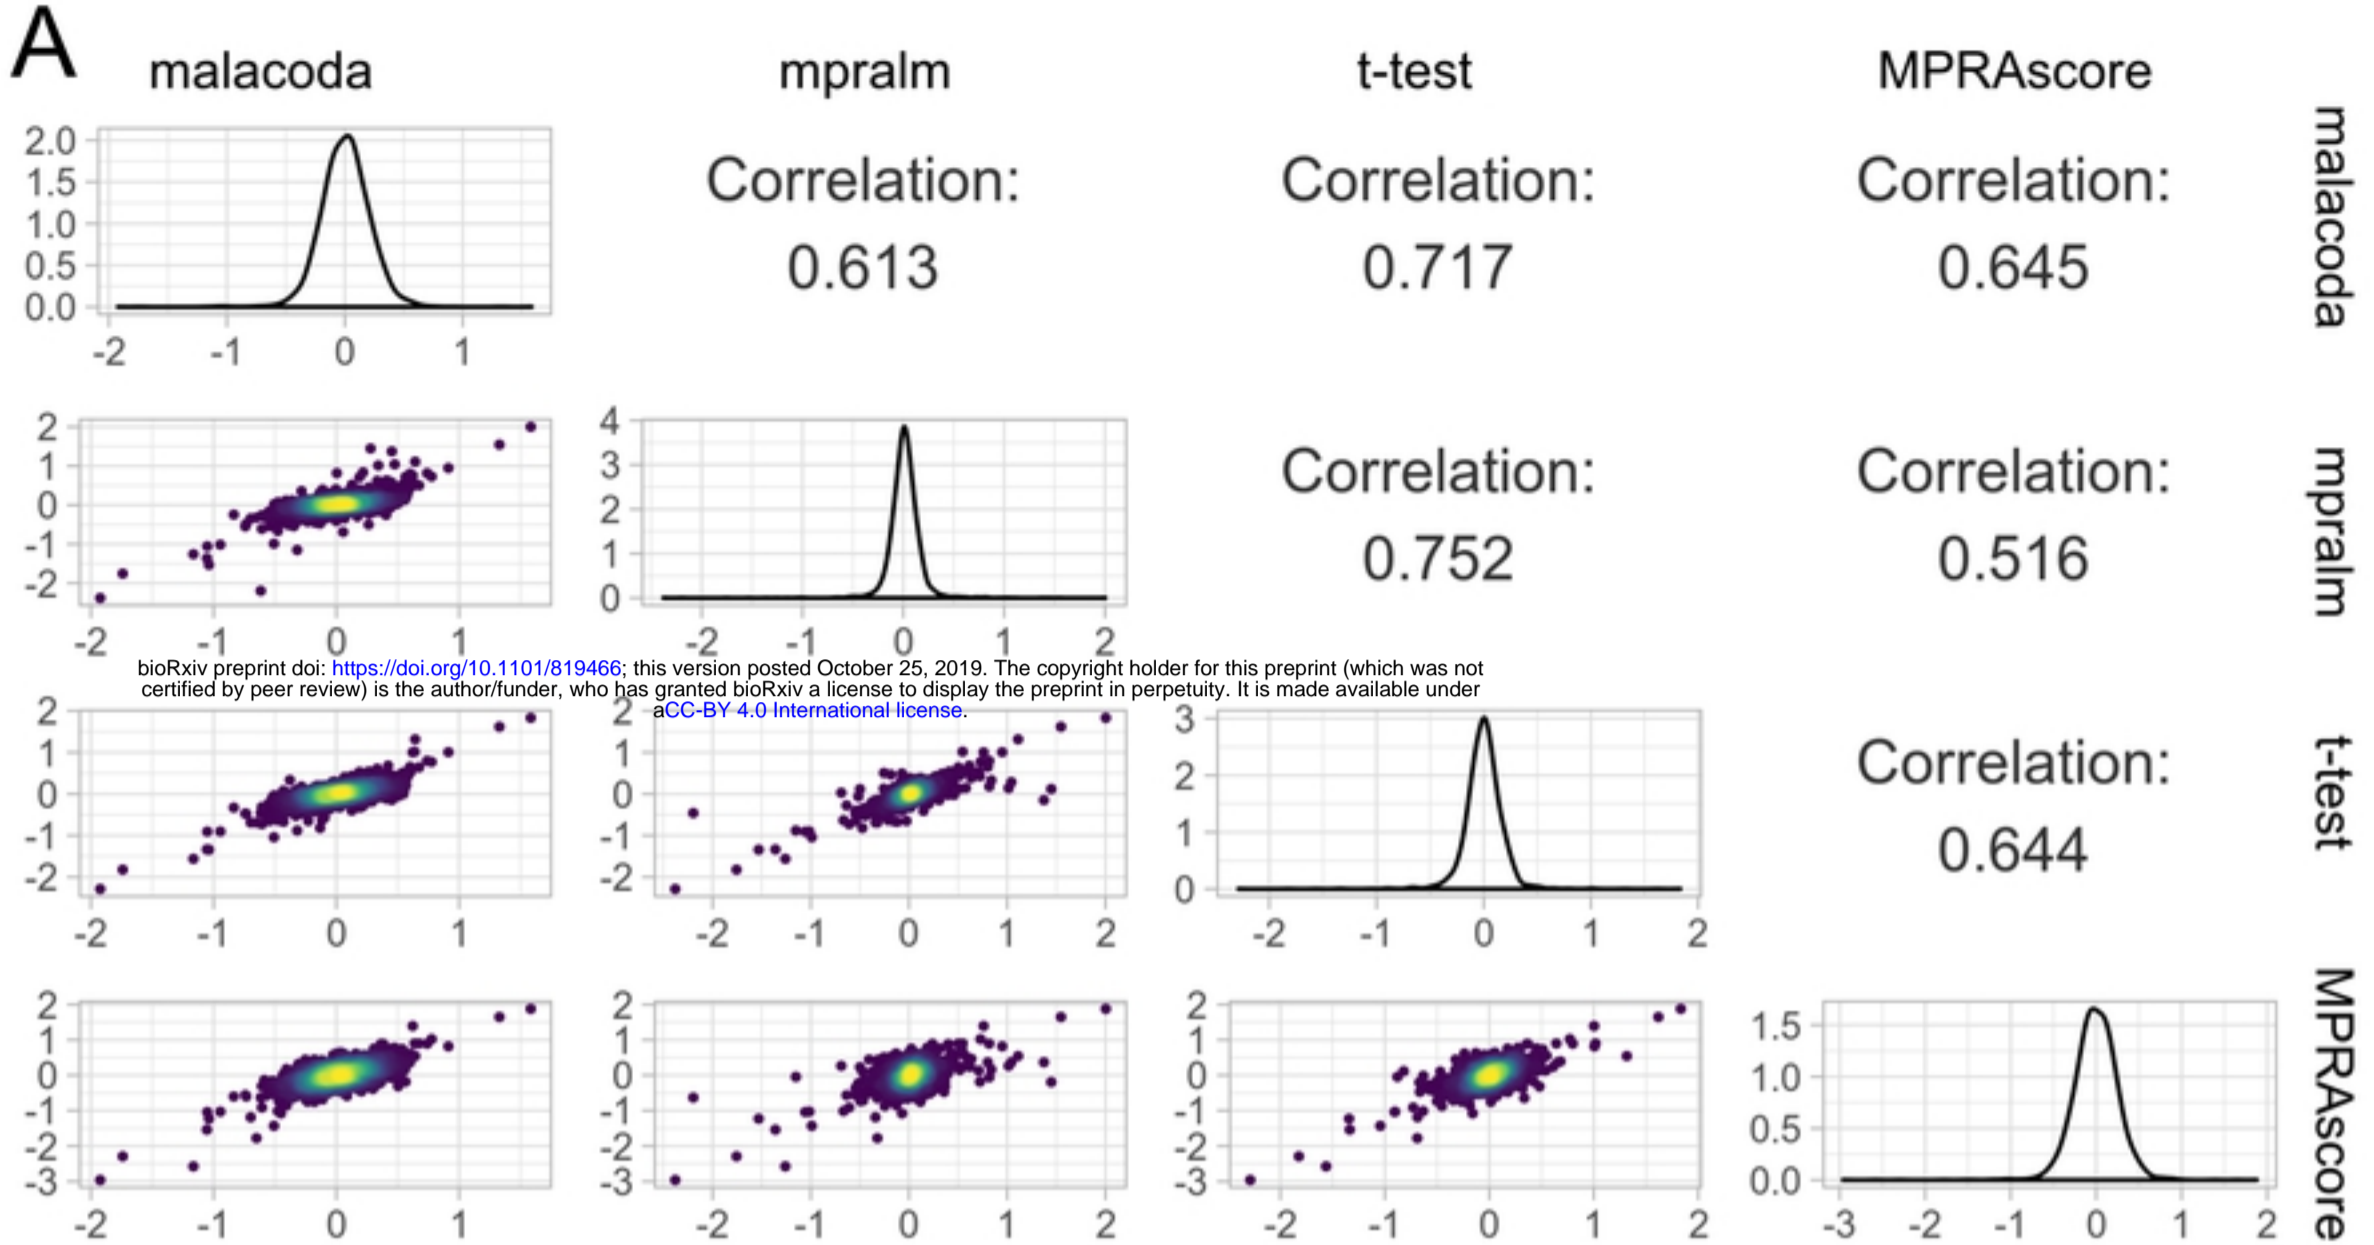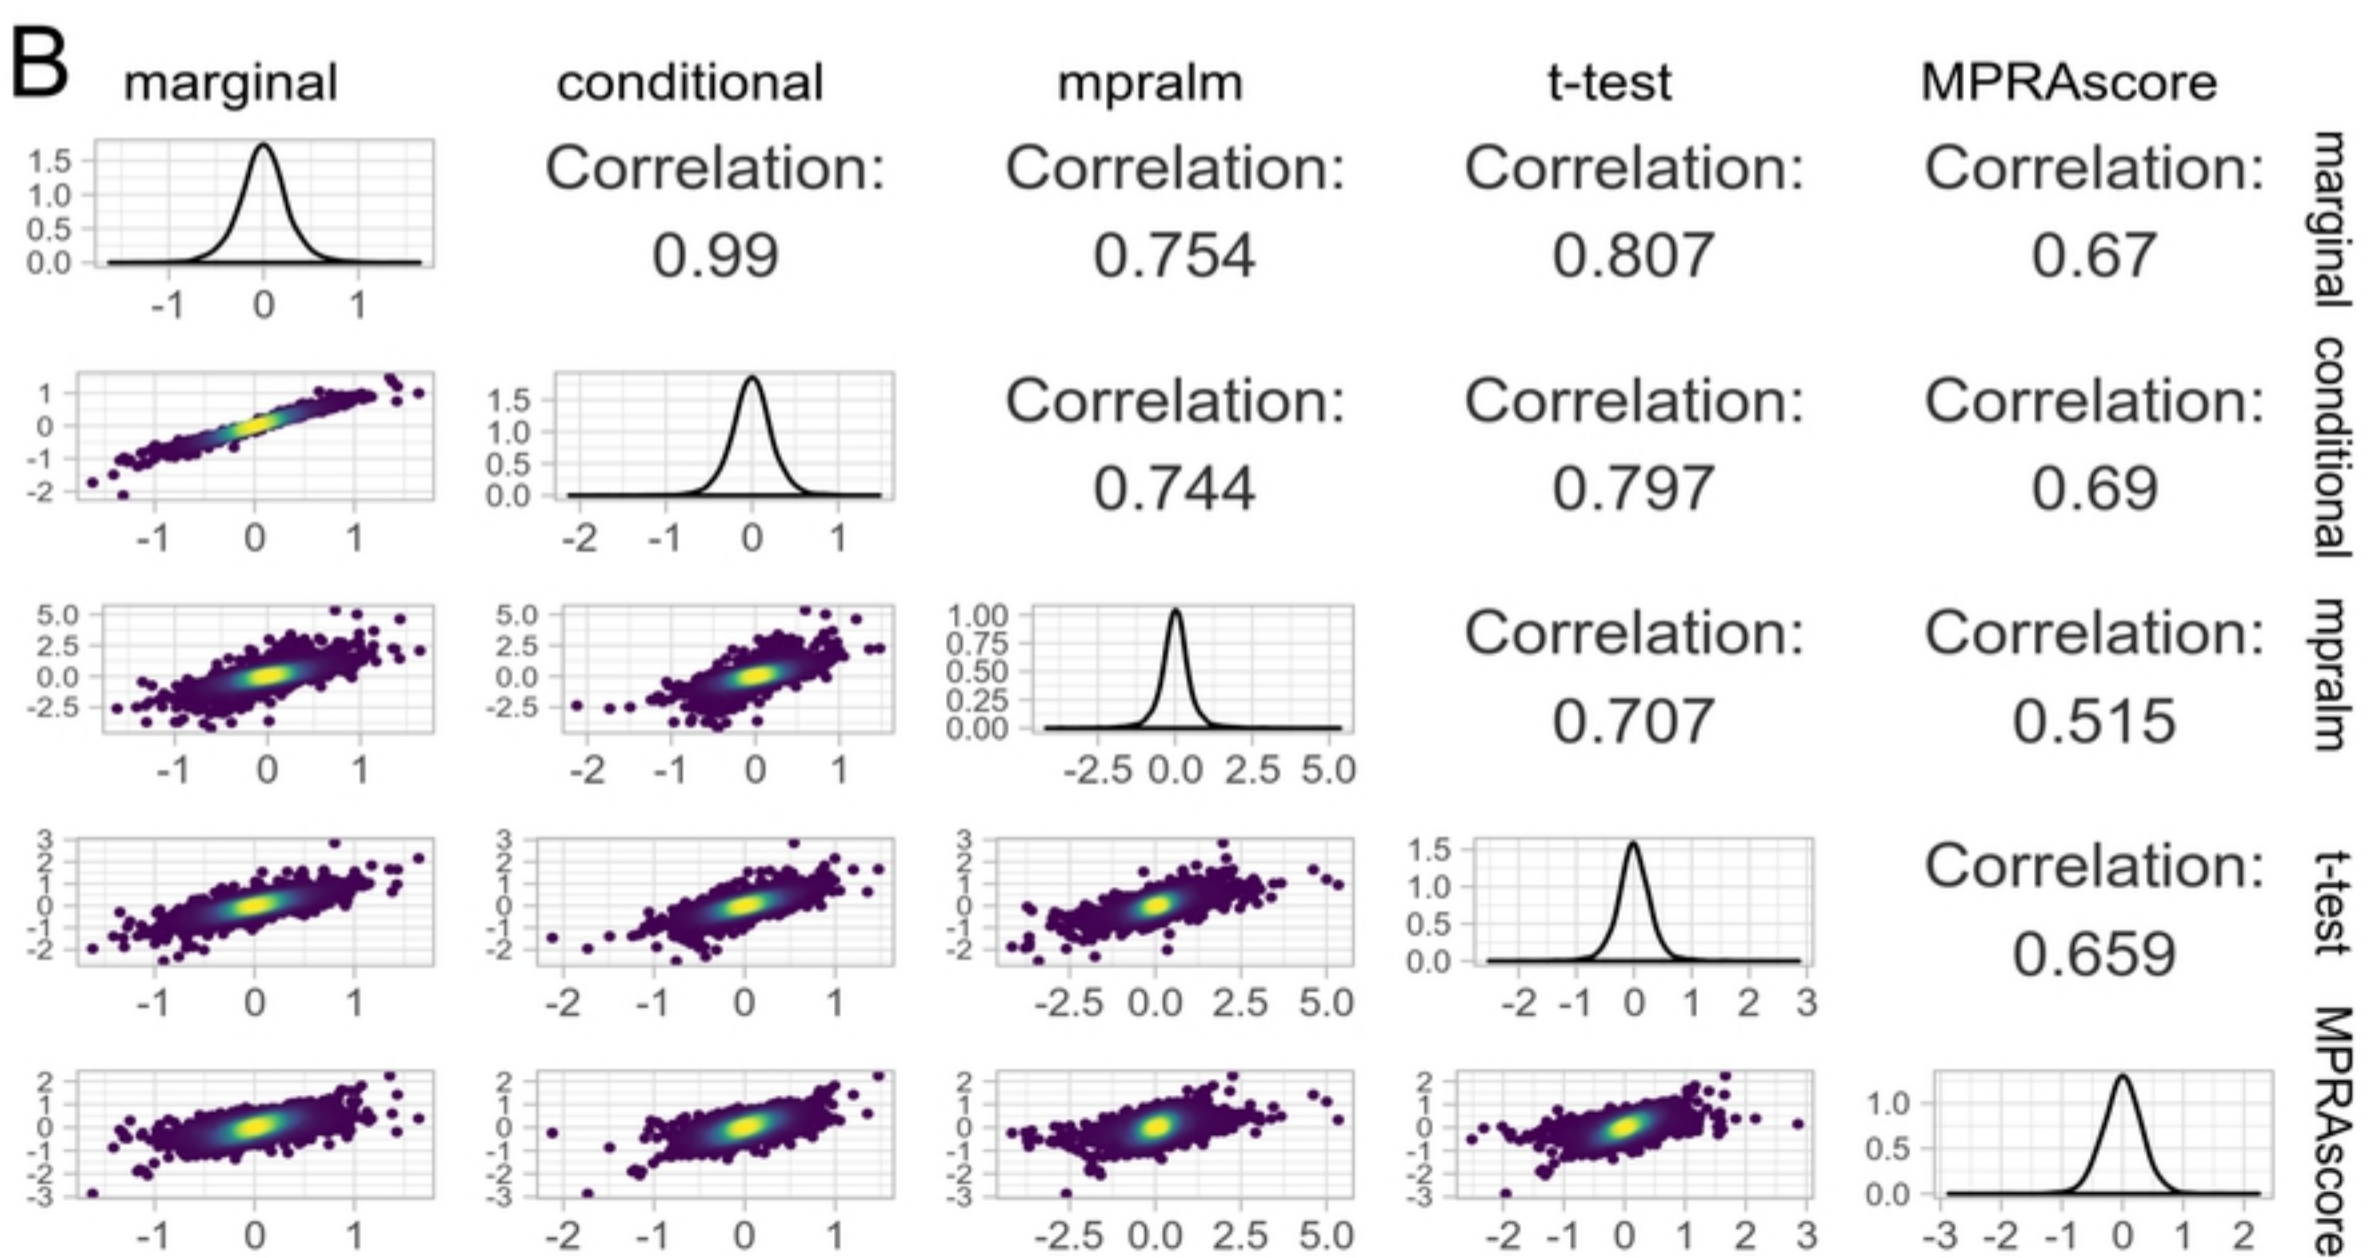

Figure 4
